# Supplementary material for: Facile rapid synthesis of a nanocrystalline Cu2Te multi-phase transition material and its thermoelectric performance
Source: Royal Society of Chemistry journal article supplement (doi:10.1039/c7ra02145c), 2017-01-01
Supplement: c7ra02145c1.pdf [file c7ra02145c1.pdf]

**Supplementary Materials:**

**Facile rapid synthesis of nanocrystalline Cu<sub>2</sub>Te multi-phase transition material and its thermoelectric performance**

Yuchong Qiu<sup>a</sup>, Jinwen Ye<sup>a,b\*</sup>, Ying Liu<sup>a,b</sup>, Xiaojiao Yang<sup>a,b</sup>

<sup>a</sup> College of Materials Science and Engineering, Sichuan University, Chengdu 610065, P.R. China;

<sup>b</sup> Key Laboratory of Advanced Special Materials and Technology, Ministry of Education, Chengdu 610065, P.R. China

---

\* Corresponding author.  
E-mail: yjw550@163.com

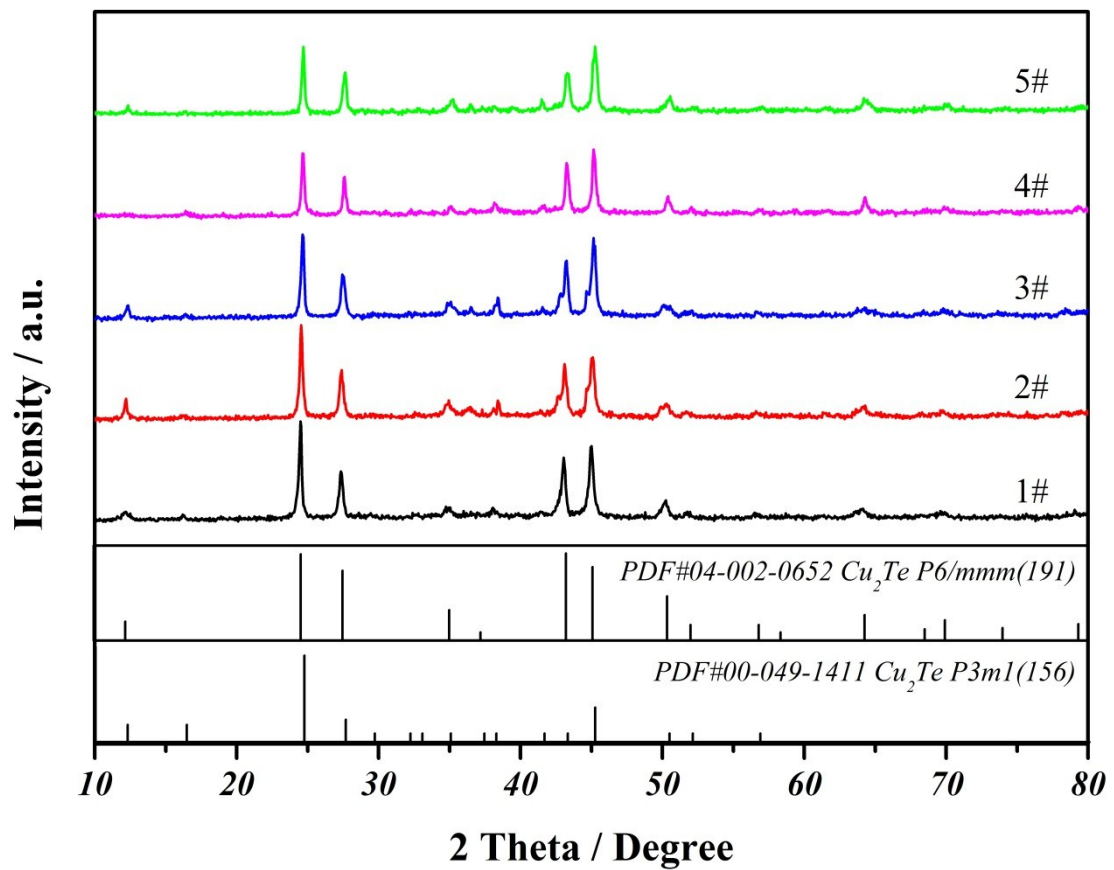

Figure S 1. XRD patterns of: (1#) SPS sintered sample; (2#) SPS followed by annealing for 10 h; (3#) SPS followed by annealing for 20 h; (4#) SPS followed by annealing for 30 h; (5#) SPS followed by annealing for 40 h.

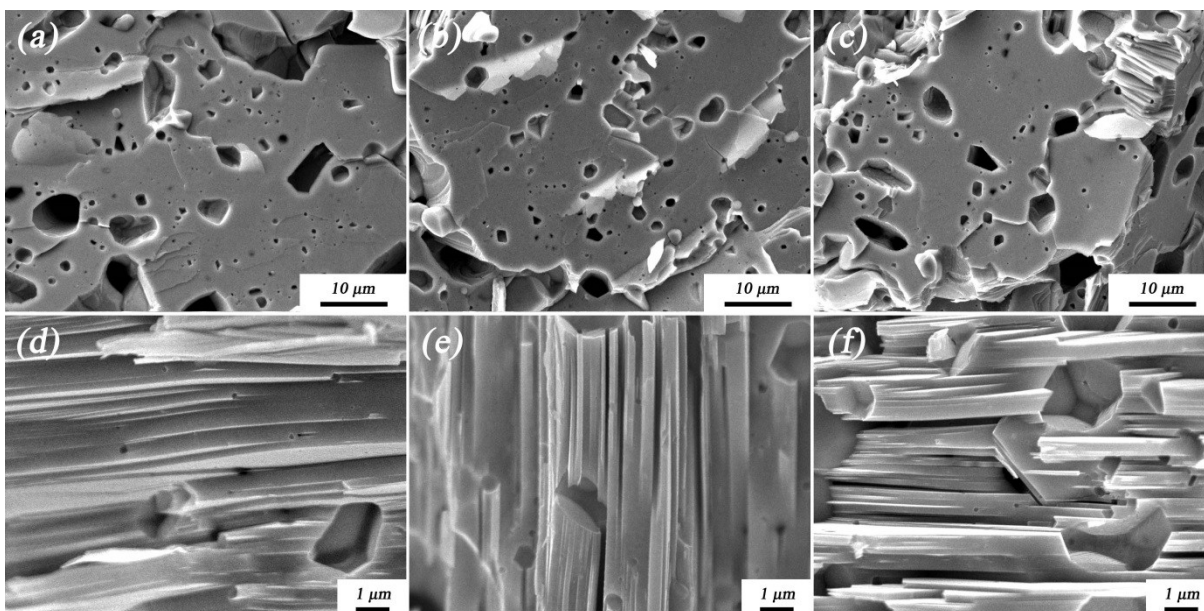

Figure S 2. SEM images of: (a) low magnification of 3# sample; (b) low magnification of 4# sample; (c) low magnification of 5# sample; (d) high magnification of 3# sample; (e) high magnification of 4# sample; (f) high magnification of 5# sample.

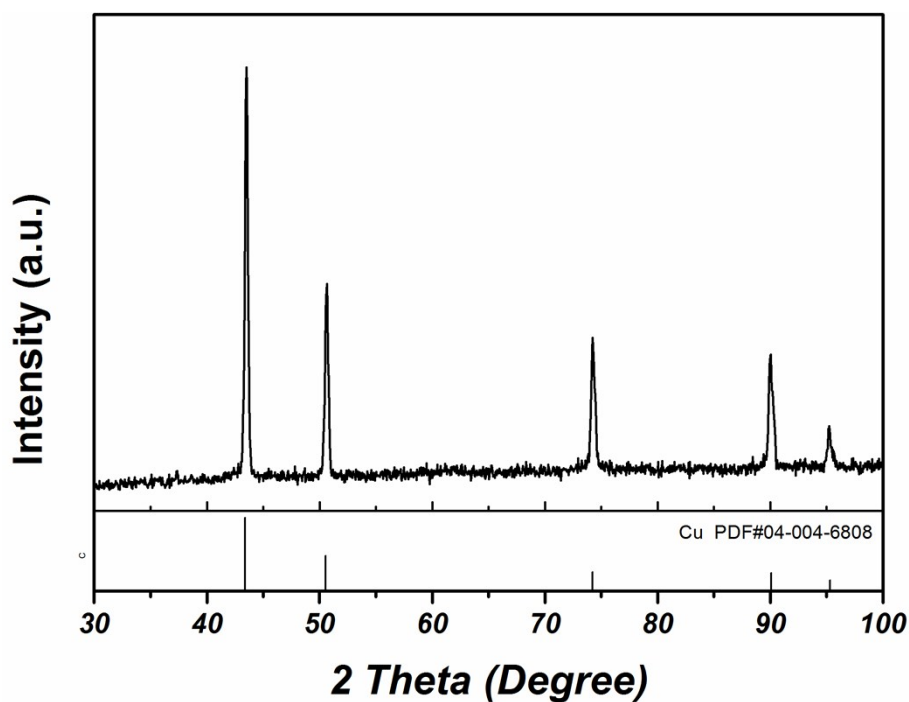

Figure S 3. XRD pattern of the powders attached to the surface of annealed samples.

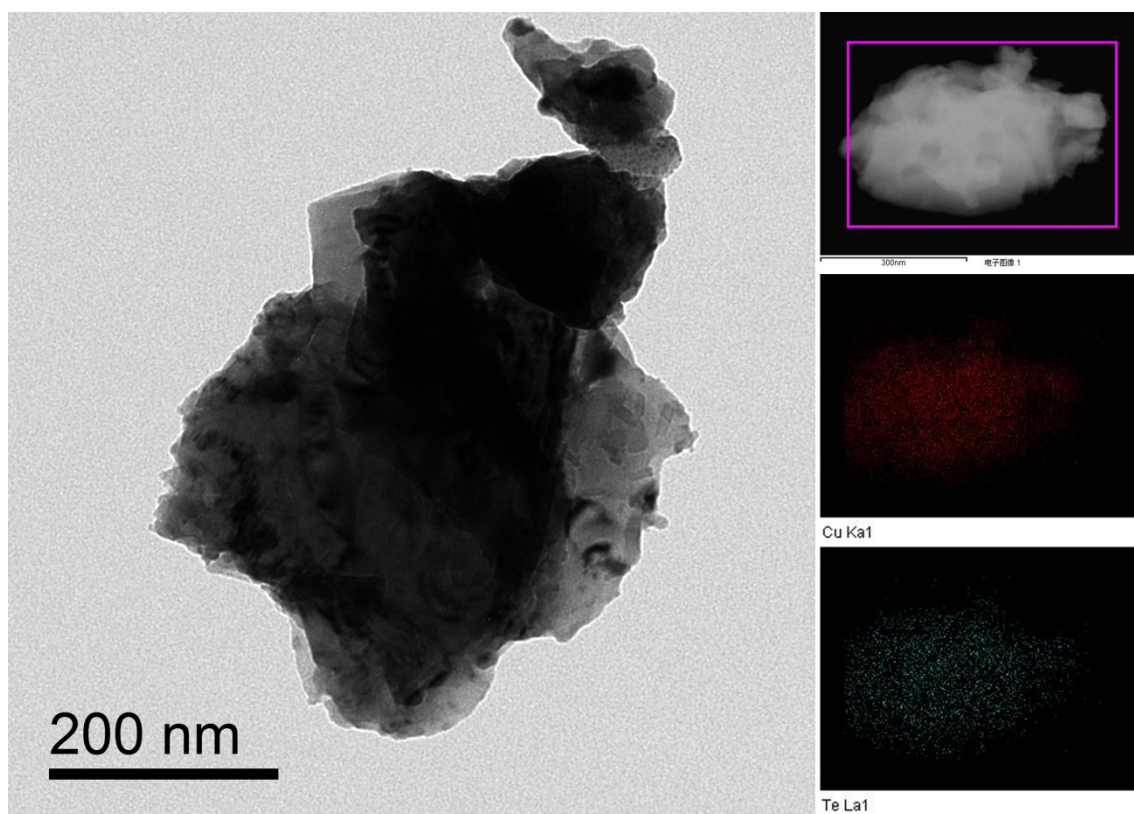

Figure S 4. TEM image of nanocrystalline  $\text{Cu}_2\text{Te}$  along with dark filed STEM image and EDS elemental mapping.

Table S 1. EDS results of each prepared Cu<sub>2</sub>Te bulk

|             | 1#    | 2#    | 3#    | 4#    | 5#    |
|-------------|-------|-------|-------|-------|-------|
| Cu (wt.%)   | 49.37 | 49.11 | 48.71 | 47.69 | 46.63 |
| Cu (at.%)   | 66.20 | 65.96 | 65.60 | 64.67 | 63.70 |
| Te (wt.%)   | 50.63 | 50.89 | 51.29 | 52.31 | 53.37 |
| Te (at.%)   | 33.80 | 34.04 | 34.40 | 35.33 | 36.30 |
| Cu:Te (at.) | 1.96  | 1.94  | 1.91  | 1.83  | 1.75  |
